# Supplementary material
Source: publisher figshare collection journal article supplement (https://tandf.figshare.com/ndownloader/files/20418549)
Supplement: Supplementary file 1 [file 20418549]

**Supplementary Scheme 1**


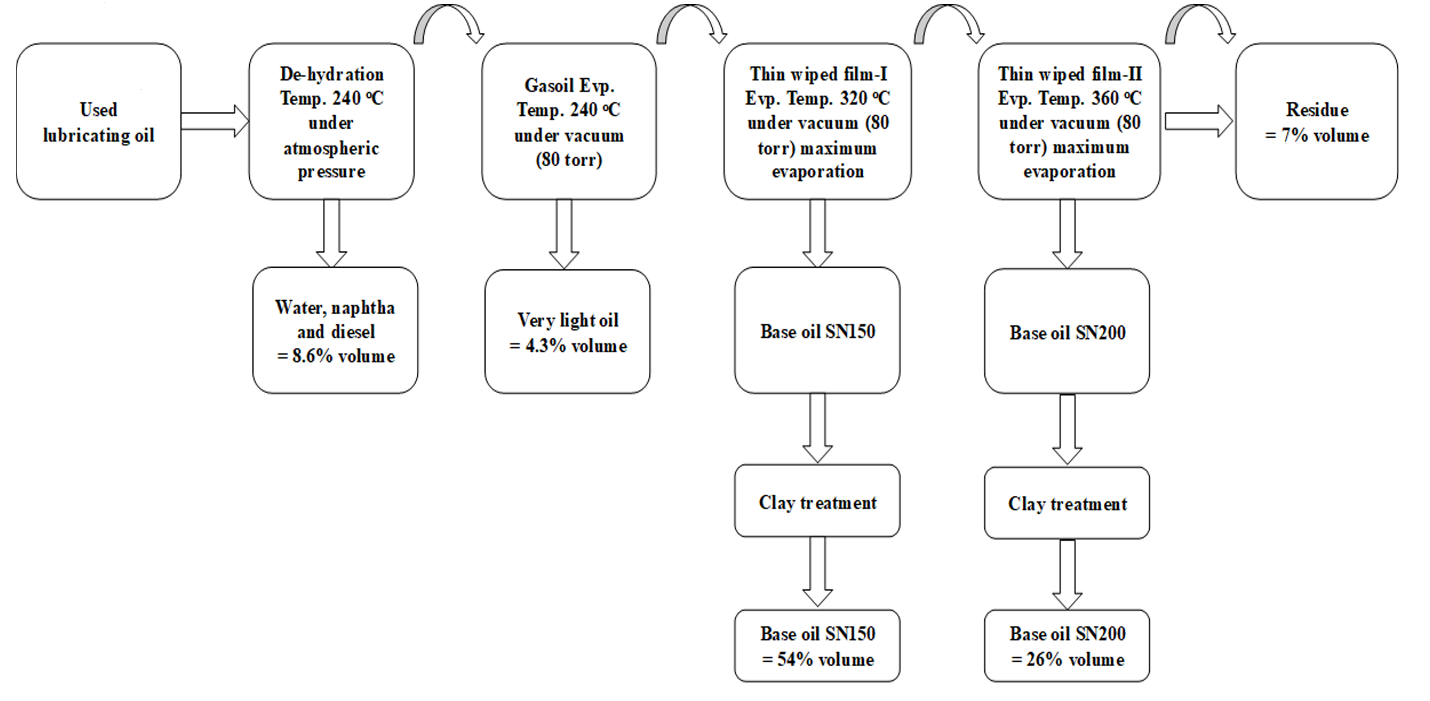


**Supplementary Scheme 1. The whole process of vacuum distillation thin wiped film evaporation technique.**
